# Supplementary material
Source: bioRxiv or medRxiv preprint supplement (https://www.biorxiv.org/highwire/filestream/72700/field_highwire_adjunct_files/2/237255-11.pdf)

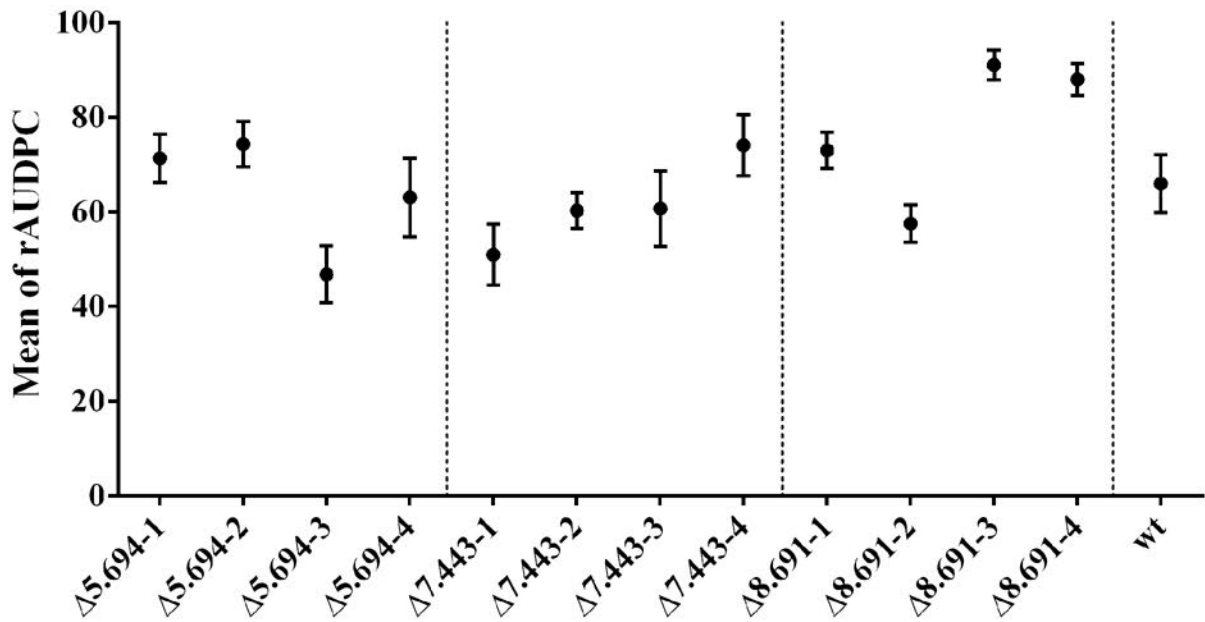

Supplement: Supplementary file [file 237255-11.pdf]
